# Supplementary material for: Low band gap disk-shaped donors for solution-processed organic solar cells
Source: Royal Society of Chemistry journal article supplement (doi:10.1039/c4ra10347e), 2014-01-01
Supplement: c4ra10347e1.pdf [file c4ra10347e1.pdf]

## Electronic Supplementary Information

# Low Band Gap Disk-shaped Donors for Solution-Processed Bulk-Hetrojunction Solar Cells

Keisuke Takemoto and Mutsumi Kimura\*

*Division of Chemistry and Materials, Faculty of Textile Science and Technology, Shinshu University, Ueda 386-8567*

### Synthetic procedures of 6-18.

**6:** A solution of 5-bromo-3-hexylthiophene-2-carbaldehyde (0.18g, 0.66mmol), 3-hexyl-2-thiopheneboronic acid pinacol ester (0.29g, 0.99mmol) and Pd(PPh<sub>3</sub>)<sub>4</sub> (15mg, 0.02mmol) in toluene (8ml), THF (9.6ml) and 2.0 M K<sub>2</sub>CO<sub>3</sub> aqueous solution (5ml) was refluxed for 48 h under nitrogen. After cooling to room temperature, the reaction mixture was poured into water, extracted with CH<sub>2</sub>Cl<sub>2</sub>. The organic layer was dried over magnesium sulfate and the solvent was evaporated. The residue was purified by column chromatography on silica gel by eluting with CH<sub>2</sub>Cl<sub>2</sub> and recycling preparative HPLC to give **6** as yellow oil (0.13g, yield 54 %). <sup>1</sup>H-NMR (400.13MHz, CDCl<sub>3</sub>): δ (ppm) = 10.00 (s, 1H, ArH), 7.24 (d, *J*=5.2Hz, 1H, ArH), 7.02 (s, 1H, ArH), 6.94 (d, *J*=5.2Hz, 1H, ArH), 2.93 (t, *J*=7.6Hz, 2H, -CH<sub>2</sub>-), 2.80 (t, *J*=7.6Hz, 2H, -CH<sub>2</sub>-), 1.75-1.62 (m, 4H, -CH<sub>2</sub>-), 1.43-1.27 (m, 12H, -CH<sub>2</sub>-), 0.93-0.88 (m, 6H, -CH<sub>3</sub>). <sup>13</sup>C-NMR (CDCl<sub>3</sub>, 100.61Hz): δ (ppm) = 182.1, 153.7, 145.9, 142.4, 136.8, 131.1, 130.3, 128.9, 125.9, 32.1, 32.0, 31.8, 30.8, 30.0, 29.6, 29.4, 28.9, 23.0, 21.7, 14.5.

**7:** N-Bromosuccinimide (NBS) (67mg, 0.37mmol) was slowly added to the solution of **6** (0.11g, 0.31mmol) in chloroform (10ml) and acetic acid (10ml). The reaction mixture was refluxed for 24h and poured into water. After extraction with CH<sub>2</sub>Cl<sub>2</sub>, the organic layer was dried over magnesium sulfate and the solvent was evaporated. The residue was purified by column chromatography on silica gel by eluting with CH<sub>2</sub>Cl<sub>2</sub> and recycling preparative HPLC to give **7** as yellow solid (94mg, yield 68%). <sup>1</sup>H-NMR (400.13MHz, CDCl<sub>3</sub>): δ (ppm) = 10.00 (s, 1H, -CHO), 7.17 (s, 1H, ArH), 7.09 (s, 1H, ArH), 3.12-3.05 (m, 2H, -CH<sub>2</sub>-), 2.99-2.90 (m, 2H, -CH<sub>2</sub>-), 1.84-1.78 (m, 4H, -CH<sub>2</sub>-), 1.51-1.40 (m, 12H, -CH<sub>2</sub>-), 1.06-1.01 (m, 6H, -CH<sub>3</sub>). <sup>13</sup>C-NMR (CDCl<sub>3</sub>, 100.61Hz): δ (ppm) = 182.4, 154.0, 146.2, 142.7, 137.1, 131.4, 130.6, 129.4, 129.2, 126.2, 32.4, 32.3, 32.1, 31.1, 31.0, 29.9, 29.8, 29.2, 23.3, 21.7, 14.7.

### Suzuki-Miyaura coupling reaction with pyrene-cores.

**8:** A solution of 2,7-Bis(4,4,5,5-tetramethyl-1,3,2-dioxaborolan-2-yl)pyrene (32mg, 0.07 mmol), **7** (94mg, 0.21mmol) and Pd(PPh<sub>3</sub>)<sub>4</sub> (21mg, 0.02mmol) in toluene (25ml), ethanol (8ml) and 2.0 M K<sub>2</sub>CO<sub>3</sub> aqueous solution (5ml) was stirred at 120 °C for 48 h under nitrogen. After cooling to room temperature, the reaction mixture was poured into water, extracted with CHCl<sub>3</sub>. The organic layer was dried over magnesium sulfate and the solvent was evaporated. The residue was purified by column chromatography on silica gel by eluting with CHCl<sub>3</sub> and recycling preparative HPLC to give **8** as yellow solid (48mg, yield 74 %). <sup>1</sup>H-NMR (400.13MHz, CDCl<sub>3</sub>): δ (ppm) = 10.00 (s, 2H, -CHO), 8.09 (s, 4H, ArH), 7.88 (s, 4H, ArH), 7.29 (s, 2H, ArH), 7.02 (s, 2H, ArH), 2.91 (t, *J*=7.9Hz, 4H, -CH<sub>2</sub>-), 2.78 (t, *J*=7.9Hz, 4H, -CH<sub>2</sub>-), 1.76-1.67 (m, 8H, -CH<sub>2</sub>-), 1.48-1.34 (m, 24H, -CH<sub>2</sub>-), 0.98-0.93 (m, 12H, -CH<sub>3</sub>). <sup>13</sup>C-NMR (CDCl<sub>3</sub>, 100.61Hz): δ (ppm) = 181.9, 153.7, 145.7, 144.1, 143.6, 136.5, 131.6, 131.3, 130.3, 128.3,

128.2, 127.4, 124.2, 122.2, 32.2, 32.0, 31.8, 30.8, 30.6, 30.5, 29.8, 29.5, 28.9, 23.1, 14.5. MALDI-TOF-MS:  $m/z$ =923.44 (M+H); Calculated for  $C_{58}H_{60}O_2S_4$ :  $m/z$ =922.39.

**9:** Yield 81%.  $^1H$ -NMR (400.13MHz,  $CDCl_3$ ):  $\delta$  (ppm) = 8.49 (d,  $J$ =9.2Hz, 2H, ArH), 8.19 (s, 2H, ArH), 8.16 (s, 1H, ArH), 8.03 (d,  $J$ =9.2Hz, 2H, ArH), 7.20 (s, 2H, ArH), 7.03 (s, 2H, ArH), 2.68 (t,  $J$ =7.9Hz, 4H,  $-CH_2-$ ), 1.85-1.78 (m, 4H,  $-CH_2-$ ), 1.56 (s, 9H,  $-CH_3$ ), 1.54-1.42 (m, 12H,  $-CH_2-$ ), 0.90 (t,  $J$ =6.9Hz, 6H,  $-CH_3$ ).  $^{13}C$ -NMR ( $CDCl_3$ , 100.61Hz):  $\delta$  (ppm) = 149.9, 144.2, 142.3, 131.7, 130.7, 130.2, 130.0, 129.0, 128.7, 126.0, 125.4, 123.7, 123.0, 121.4, 35.7, 32.4, 32.2, 31.2, 31.0, 29.6, 25.1, 23.2, 14.7. MALDI-TOF-MS:  $m/z$ =590.37 (M+H); calculated for  $C_{40}H_{46}S_2$ :  $m/z$ =590.30.

**11:** Yield 66%.  $^1H$ -NMR (400.13MHz,  $CDCl_3$ ):  $\delta$  (ppm) = 8.58 (d,  $J$ =9.2Hz, 2H, ArH), 8.21 (s, 2H, ArH), 8.09 (d,  $J$ =9.2Hz, 2H, ArH), 7.22 (s, 1H, ArH), 7.05 (s, 2H, ArH), 6.89 (s, 2H, ArH), 2.86 (t,  $J$ =8.0Hz, 4H, ArH), 2.61 (t,  $J$ =7.2Hz, 4H,  $-CH_2-$ ), 1.89-1.81 (m, 4H,  $-CH_2-$ ), 1.79-1.73 (m, 4H,  $-CH_2-$ ), 1.68 (s, 12H,  $-CH_3$ ), 1.51-1.45 (m, 4H,  $-CH_2-$ ), 1.38-1.33 (m, 24H,  $-CH_2-$ ), 0.90 (m, 12H,  $-CH_3$ ).  $^{13}C$ -NMR ( $CDCl_3$ , 100.61Hz):  $\delta$  (ppm) = 150.0, 149.3, 144.1, 140.3, 136.2, 132.7, 131.7, 130.3, 129.6, 128.9, 127.7, 126.2, 125.3, 123.7, 120.5, 35.7, 32.4, 32.2, 31.2, 31.0, 30.9, 30.0, 29.8, 29.5, 23.2, 23.1, 14.6. MALDI-TOF-MS:  $m/z$  = 922.32 (M+H); Calculated for  $C_{60}H_{74}S_4$ :  $m/z$ =922.47.

**13:** Yield 76%.  $^1H$ -NMR (400.13MHz,  $CDCl_3$ ):  $\delta$  (ppm) = 8.54 (s, 4H, ArH), 8.21 (s, 2H, ArH), 7.23 (s, 4H, ArH), 7.09 (s, 4H, ArH), 2.72 (t,  $J$  = 7.6Hz, 8H,  $-CH_2-$ ), 1.76-1.69 (m, 8H,  $-CH_2-$ ), 1.45-1.32 (m, 24H,  $-CH_2-$ ), 0.91 (t,  $J$  = 7.2Hz, 12H,  $-CH_3$ ).  $^{13}C$ -NMR ( $CDCl_3$ , 100.61Hz):  $\delta$  (ppm) = 144.0, 142.0, 131.3, 130.5, 130.2, 129.2, 126.4, 126.1, 121.5, 32.1, 31.1, 31.0, 29.5, 23.1, 14.5. MALDI-TOF-MS:  $m/z$  = 866.51 (M+H); Calculated for  $C_{56}H_{66}S_4$ :  $m/z$ =866.40.

**15:** Yield 80%.  $^1H$ -NMR (400.13MHz,  $CDCl_3$ ):  $\delta$  (ppm) = 8.64 (s, 4H, ArH), 8.26 (s, 2H, ArH), 7.25 (s, 4H, ArH), 7.06 (s, 4H, ArH), 6.93 (s, 4H, ArH), 2.87 (t,  $J$  = 7.6Hz, 8H,  $-CH_2-$ ), 2.64 (t,  $J$  = 7.6Hz, 8H,  $-CH_2-$ ), 1.79-1.72 (m, 8H,  $-CH_2-$ ), 1.71-1.63 (m, 8H,  $-CH_2-$ ), 1.47-1.31 (m, 48H,  $-CH_2-$ ), 0.92-0.88 (m, 24H,  $-CH_3$ ).  $^{13}C$ -NMR ( $CDCl_3$ , 100.61Hz):  $\delta$  (ppm) = 144.1, 140.3, 139.9, 136.1, 132.9, 131.7, 131.0, 130.0, 129.1, 127.8, 126.5, 126.1, 120.5, 32.1, 31.2, 30.9, 30.8, 29.9, 29.8, 29.5, 23.1, 23.0, 14.5. MALDI-TOF-MS:  $m/z$ =1530.82 (M+H); Calculated for  $C_{96}H_{122}S_8$ :  $m/z$ =1531.74.

**17:** Yield 64%.  $^1H$ -NMR (400.13MHz,  $CDCl_3$ ):  $\delta$  (ppm) = 8.63 (s, 4H, ArH), 8.25 (s, 2H, ArH), 7.25 (s, 4H, ArH), 7.04 (s, 4H, ArH), 6.93 (s, 4H, ArH), 2.87 (t,  $J$  = 7.6Hz, 8H), 2.31 (s, 12H,  $-CH_3$ ), 1.82-1.75 (m, 8H,  $-CH_2-$ ), 1.79-1.72 (m, 8H,  $-CH_2-$ ), 1.40-1.34 (m, 16H,  $-CH_2-$ ), 0.90 (t,  $J$ =7.2Hz, 24H,  $-CH_3$ ).  $^{13}C$ -NMR ( $CDCl_3$ , 100.61Hz):  $\delta$  (ppm) = 140.4, 140.0, 138.5, 136.2, 132.7, 131.7, 131.0, 130.0, 129.1, 128.7, 126.1, 121.2, 32.1, 31.2, 29.9, 29.7, 23.1, 16.2, 14.5. MALDI-TOF-MS:  $m/z$ =1250.08 (M+H); Calculated for  $C_{76}H_{82}S_8$ :  $m/z$ =1249.98.

### Bromination of thiophene terminates.

**10:** NBS (0.12g, 0.65mmol) was slowly added to the solution of **9** (0.15g, 0.32mmol) in dry THF (20ml) at 0°C. The reaction mixture was stirred for 12h at RT and poured into water. After extraction with  $CH_2Cl_2$ , the organic layer was dried over magnesium sulfate and the solvent was evaporated. The residue was purified by column chromatography on silica gel by eluting with  $CH_2Cl_2$  and recycling preparative HPLC to give **10** as yellow solid (0.19g, yield 95%).  $^1H$ -NMR (400.13MHz,  $CDCl_3$ ):  $\delta$  (ppm) = 8.32 (d,  $J$ =9.2Hz, 2H, ArH), 8.11 (s, 2H, ArH), 7.95 (d,  $J$ =9.2Hz, 2H, ArH), 7.92 (s, 1H, ArH), 6.95 (s, 2H,  $-CH_2-$ ), 2.56 (t,  $J$ =7.9Hz, 4H,  $-CH_2-$ ), 1.80-1.78 (m, 4H,  $-CH_2-$ ), 1.64 (s, 9H,  $-CH_3$ ), 1.52-1.38 (m, 4H,  $-CH_2-$ ), 0.81 (t,  $J$ =7.2Hz, 6H,  $-CH_3$ ).  $^{13}C$ -NMR ( $CDCl_3$ , 100.61Hz):  $\delta$  (ppm) = 150.1, 143.1, 142.0, 131.5, 130.2, 129.6, 129.2, 129.1, 126.0, 125.6, 124.9, 123.5, 110.1, 35.7, 32.4, 32.3, 30.4, 30.3, 29.6, 23.2, 14.6. MALDI-TOF-MS:  $m/z$ =747.95 (M+H); Calculated for  $C_{40}H_{44}Br_2S_2$ :  $m/z$ =746.12.

**14:** Yield 94%. <sup>1</sup>H-NMR (400.13MHz, CDCl<sub>3</sub>): δ (ppm) = 8.49 (s, 4H, ArH), 8.09 (s, 2H, ArH), 7.07 (s, 4H, ArH), 2.68 (t, *J* = 7.2Hz, 8H, -CH<sub>2</sub>-), 1.73-1.65 (m, 8H, -CH<sub>2</sub>-), 1.45-1.33 (m, 24H, -CH<sub>2</sub>-), 0.91 (t, *J* = 7.2Hz, 12H, -CH<sub>3</sub>). <sup>13</sup>C-NMR (CDCl<sub>3</sub>, 100.61Hz): δ (ppm) = 143.2, 141.5, 129.8, 129.4, 126.2, 126.1, 110.3, 32.0, 30.2, 30.1, 29.4, 23.0, 14.5. MALDI-TOF-MS: *m/z*=1182.36 (M+H); Calculated for C<sub>56</sub>H<sub>62</sub>Br<sub>4</sub>S<sub>4</sub>: *m/z*=1182.04.

#### Formylation of thiophene terminates.

**12:** A solution of **11** (0.19g, 0.21mmol) in dry 1,2-dichloroethane (15ml) was stirred at 0°C. Vilsmeier-reagent, which was prepared with 1 ml of POCl<sub>3</sub> in dry DMF 5 ml, was added. The mixture was refluxed for overnight and quenched 10% aqueous solution of NaOAc after cooling. After extraction with CH<sub>2</sub>Cl<sub>2</sub>, the organic layer was dried over magnesium sulfate and the solvent was evaporated. The residue was purified by column chromatography on silica gel by eluting with CH<sub>2</sub>Cl<sub>2</sub> and recycling preparative HPLC to give **12** as yellow solid (0.15g, Yield 74%). <sup>1</sup>H-NMR (400.13MHz, CDCl<sub>3</sub>): δ (ppm) = 10.05 (s, 2H, ArH), 8.56 (d, *J*=9.2Hz, 2H, ArH), 8.29 (s, 2H, ArH), 8.22 (s, 1H, ArH), 8.14 (d, *J*=9.3Hz, 2H, ArH), 7.30 (s, 2H, ArH), 7.15 (s, 2H, ArH), 2.96 (t, *J*=7.6Hz, 8H, -CH<sub>2</sub>-), 1.85-1.78 (m, 4H, -CH<sub>2</sub>-), 1.77-1.70 (m, 4H, -CH<sub>2</sub>-), 1.64 (s, 9H, -CH<sub>3</sub>), 1.55-1.48 (m, 4H, -CH<sub>2</sub>-), 1.45-1.34 (m, 20H, -CH<sub>2</sub>-), 0.98-0.93 (m, 12H, -CH<sub>3</sub>). <sup>13</sup>C-NMR (CDCl<sub>3</sub>, 100.61Hz): δ (ppm) = 182.0, 153.7, 145.6, 143.0, 142.3, 136.9, 132.2, 131.5, 130.0, 129.4, 129.1, 128.8, 126.0, 124.8, 123.5, 35.7, 32.3, 32.0, 31.8, 30.9, 30.4, 29.8, 29.4, 28.9, 25.1, 23.1, 23.0, 21.8, 14.5. MALDI-TOF-MS: *m/z*=978.42 (M+H); Calculated for C<sub>62</sub>H<sub>74</sub>O<sub>2</sub>S<sub>4</sub>: *m/z*=978.46.

**16:** Yield 76%. <sup>1</sup>H-NMR (400.13MHz, CDCl<sub>3</sub>): δ (ppm) = 10.05 (s, 4H, -CHO), 8.63 (s, 4H, ArH), 8.27 (s, 2H, ArH), 7.30 (s, 4H, ArH), 7.14 (s, 4H, ArH), 3.00-2.91 (m, 16H, -CH<sub>2</sub>-), 1.82-1.70 (m, 16H, -CH<sub>2</sub>-), 1.50-1.31 (m, 48H, -CH<sub>2</sub>-), 0.90 (m, 24H, -CH<sub>3</sub>). <sup>13</sup>C-NMR (CDCl<sub>3</sub>, 100.61Hz): δ (ppm) = 182.1, 153.8, 145.3, 143.0, 141.8, 137.0, 132.5, 131.8, 129.8, 129.4, 129.0, 126.3, 32.1, 32.0, 31.8, 20.9, 30.3, 29.7, 29.4, 29.9, 23.1, 23.0, 14.5. MALDI-TOF-MS: *m/z*=1642.37 (M+H); Calculated for C<sub>160</sub>H<sub>122</sub>O<sub>4</sub>S<sub>8</sub>: *m/z*=1642.71.

**18:** Yield 49%. <sup>1</sup>H-NMR (400.13MHz, CDCl<sub>3</sub>): δ (ppm) = 10.03 (s, 4H, -CHO), 8.40 (s, 4H, ArH), 8.14 (s, 2H, ArH), 7.21 (s, 4H, ArH), 7.06 (s, 4H, ArH), 2.90 (t, *J* = 7.6Hz, 8H, -CH<sub>2</sub>-), 2.58 (s, 12H, -CH<sub>3</sub>), 1.81-1.72 (m, 8H, -CH<sub>2</sub>-), 1.52-1.44 (m, 8H, -CH<sub>2</sub>-), 1.39-1.33 (m, 16H, -CH<sub>2</sub>-), 0.90 (t, *J* = 7.2Hz, 12H, -CH<sub>3</sub>). <sup>13</sup>C-NMR (CDCl<sub>3</sub>, 100.61Hz): δ (ppm) = 182.1, 148.2, 145.2, 143.0, 141.9, 136.9, 132.4, 131.7, 131.0, 129.7, 129.3, 128.7, 125.9, 32.1, 30.9, 30.4, 29.8, 23.1, 14.6. MALDI-TOF-MS: *m/z*=1362.25 (M+H); Calculated for C<sub>80</sub>H<sub>82</sub>O<sub>4</sub>S<sub>8</sub>: *m/z*=1362.40.

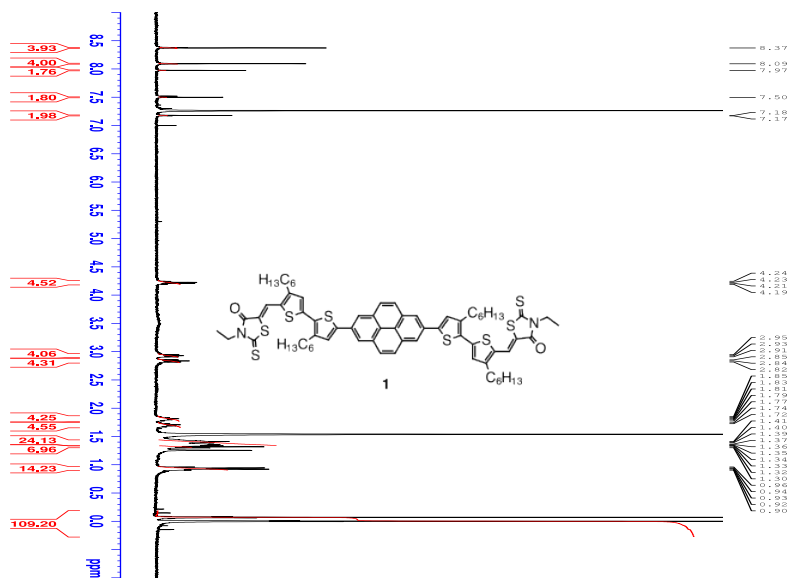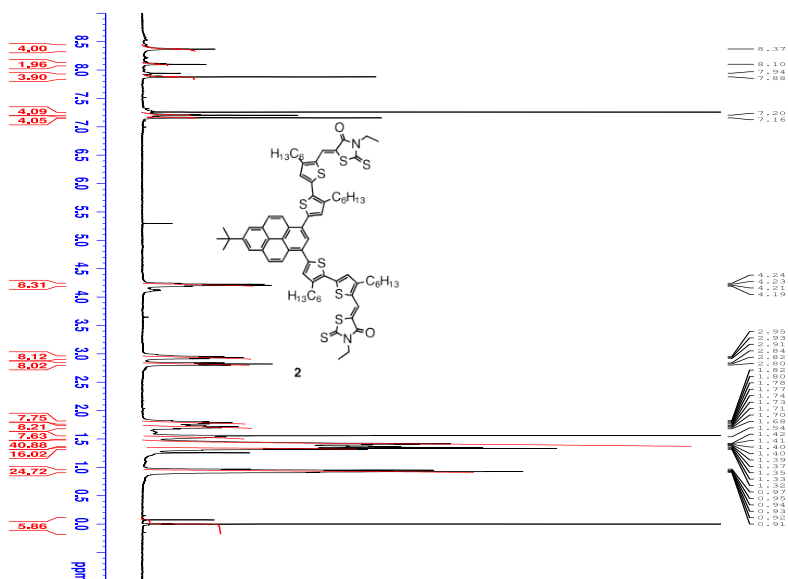

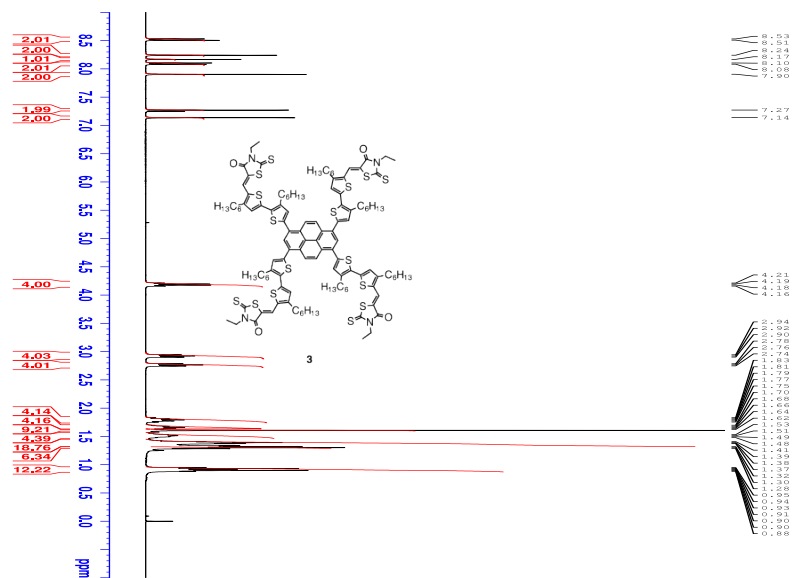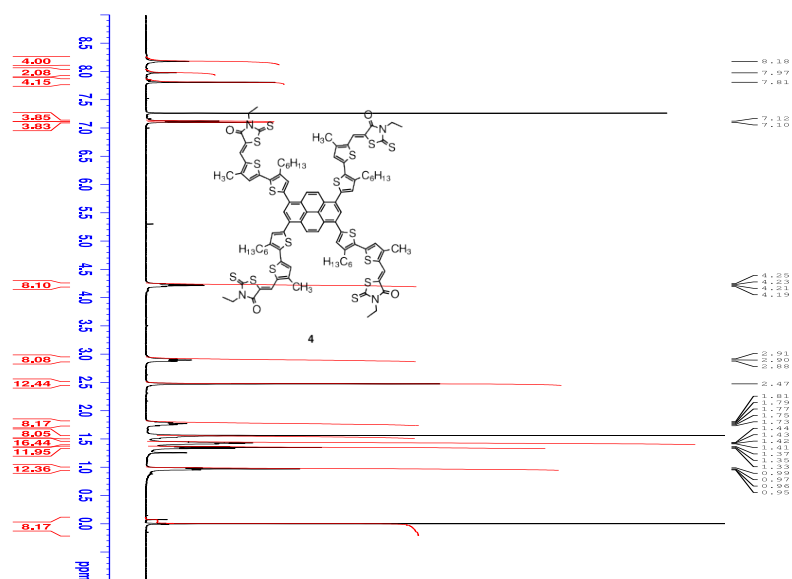

**Fig. S1.** <sup>1</sup>H-NMR spectra of **1-4** in CDCl<sub>3</sub>.

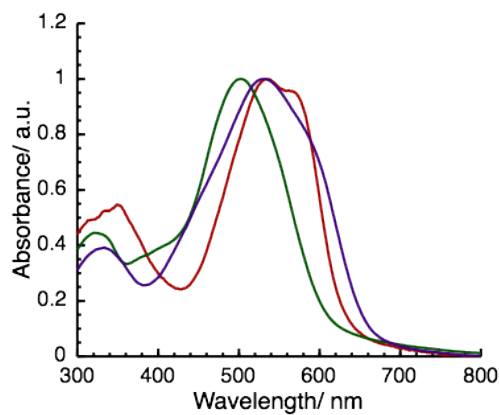

**Fig. S2.** Absorption spectra of spin-coated thin films of **1**(red), **2**(green) and **4**(purple).

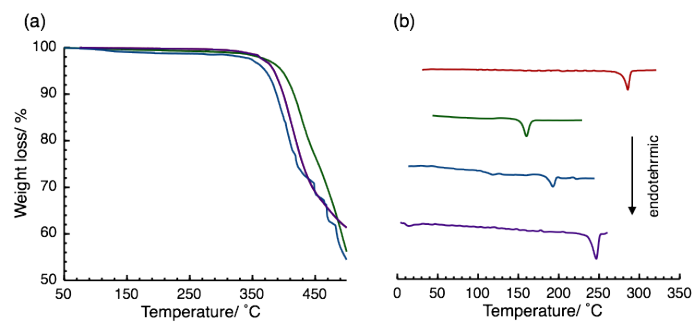

**Fig. S3.** TGA (a) and DSC (b) profiles for **1** (red), **2** (green), **3**(blue) and **4**(purple) at scan rate of 10°C/ min.

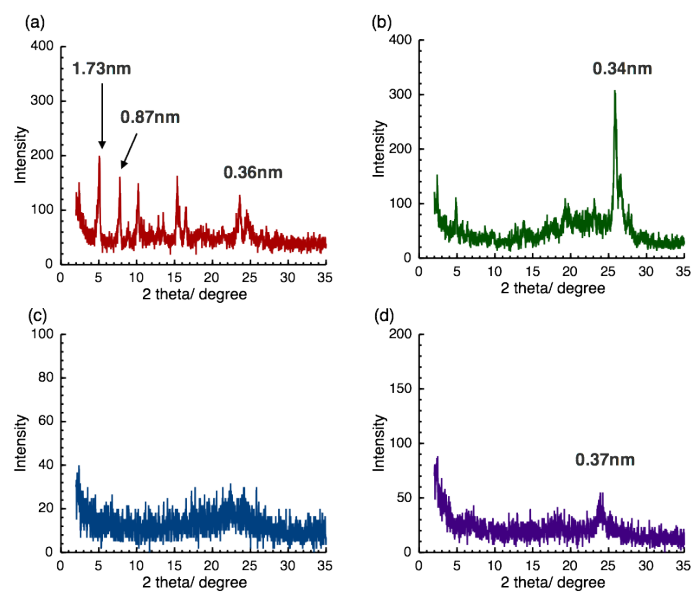

**Fig. S4.** XRD patterns of **1**(a), **2**(b), **3**(c) and **4**(d) at RT.

## Hole-mobility measurement

Hole-mobility of donor materials were carried out with the device structure of ITO/ PEDOT:PSS/ donor material/ Au by taking current-voltage curves in the range of 0-7V. The hole-mobility was calculated using the space charge current limited (SCLC) method using the Mott-Gurney square law<sup>1-4</sup> (Eq. 1),

$$J = \frac{9}{8} \epsilon_0 \epsilon_r \mu_h \frac{V^2}{L^3} \quad (1)$$

where  $J$  is the current density,  $\epsilon_0$  is the permittivity of free space ( $8.85 \times 10^{-12}$  F m<sup>-1</sup>),  $\epsilon_r$  is the relative dielectric constant of the transport of medium (assumed to be 3),  $\mu_h$  is the hole mobility,  $V$  is the internal voltage in the device ( $V = V_{\text{appl}} - V_r - V_{\text{bi}}$ , where  $V_{\text{appl}}$  is the applied voltage in the device,  $V_r$  is voltage drop due to the contact resistance,  $V_{\text{bi}}$  is the built-in voltage due to relative work function difference between the two electrodes. The  $V_{\text{bi}}$  can be determined from the transition between the Ohmic region and SCLC region) and  $L$  is the thickness of film.

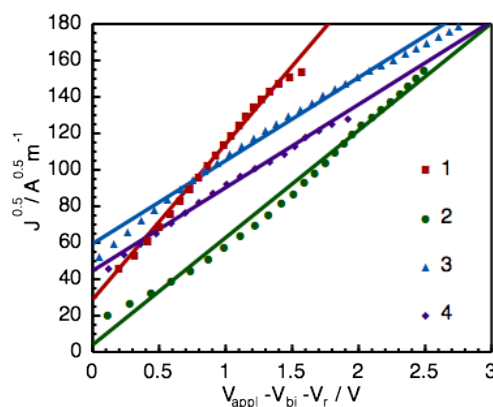

**Fig. S5.**  $J^{0.5}$ - $V$  plots for **1** (red), **2** (green), **3** (blue) and **4** (purple) hole-only devices under dark condition. The solid lines are fitted with the data points. Film thickness: **1**, 35nm; **2**, 50nm; **3**, 30nm; **4**, 45nm.

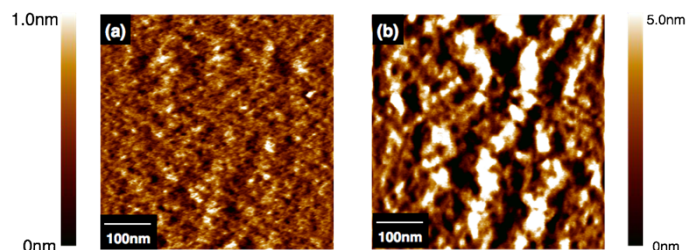

**Fig. S6.** Tapping-mode AFM height images of a) 4/PC<sub>71</sub>BM and b) P3HT/PC<sub>61</sub>BM blended films.

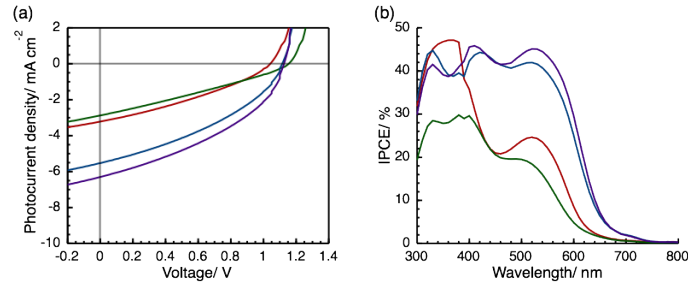

**Fig. S7.** (a) Photocurrent voltage curve obtained with BHJ solar cells based on **1** (red), **2** (green), **3** (blue) and **4**(purple)/PC<sub>61</sub>BM blended active layers under a standard global AM 1.5 solar condition. b) Incident photon-to-current conversion efficiency spectrum based on **1** (red), **2** (green), **3** (blue) and **4** (purple)/PC<sub>61</sub>BM and blended active layers.

**Table S1.** Summary of device parameters of BHJ solar cells based on mixed active layers composed of **1-4** and PC<sub>61</sub>BM with different composition.

| Active layer<br>(Weight ratio)       | thickness<br>/nm | $V_{oc}$<br>/V | $J_{sc}$<br>/mA cm <sup>-2</sup> | $FF$ | PCE<br>/% |
|--------------------------------------|------------------|----------------|----------------------------------|------|-----------|
| <b>1</b> / PC <sub>61</sub> BM (1:1) | 60               | 0.67           | 1.66                             | 0.39 | 0.4       |
| <b>1</b> / PC <sub>61</sub> BM (1:2) | 65               | 1.04           | 3.21                             | 0.33 | 1.1       |
| <b>1</b> / PC <sub>61</sub> BM (1:3) | 65               | 0.92           | 2.66                             | 0.34 | 0.8       |
| <b>2</b> / PC <sub>61</sub> BM (1:3) | 75               | 0.71           | 2.53                             | 0.29 | 0.5       |
| <b>2</b> / PC <sub>61</sub> BM (1:4) | 70               | 1.15           | 2.87                             | 0.29 | 1.0       |
| <b>2</b> / PC <sub>61</sub> BM (1:5) | 70               | 0.83           | 2.59                             | 0.28 | 0.6       |
| <b>3</b> / PC <sub>61</sub> BM (1:3) | 70               | 0.96           | 5.58                             | 0.38 | 2.0       |
| <b>3</b> / PC <sub>61</sub> BM (1:4) | 70               | 1.11           | 5.53                             | 0.38 | 2.3       |
| <b>3</b> / PC <sub>61</sub> BM (1:5) | 70               | 1.01           | 5.01                             | 0.40 | 2.0       |
| <b>4</b> / PC <sub>61</sub> BM (1:2) | 70               | 1.10           | 5.50                             | 0.36 | 2.1       |
| <b>4</b> / PC <sub>61</sub> BM (1:3) | 70               | 1.13           | 6.30                             | 0.39 | 2.8       |
| <b>4</b> / PC <sub>61</sub> BM (1:4) | 70               | 1.10           | 5.97                             | 0.39 | 2.5       |

### Discussion about the open circuit voltage

The dark injected current  $J_{inj}$  versus applied voltage for **1-4** and P3HT /PC<sub>61</sub>BM devices was exponentially fitted according to Eq. 2, therefore to determine reverse saturation current density  $J_{0,n}$  (Fig. S8).<sup>5</sup>

$$J_{inj} = J_{0,n} \exp\left(\frac{qV}{nkT}\right) \quad (2)$$

$J_{so}$  is calculated according to Eq. 3.<sup>6</sup>

$$J_{0,n} = J_{so} \exp\left(\frac{-\Delta E_{DA}}{2nkT}\right) \quad (3)$$

For comparison, the  $V_{oc}$  values of **1-4** and P3HT/ PC<sub>61</sub>BM were calculated from Eq. 4, and the calculated  $V_{oc}$  values were consistent with the experimental  $V_{oc}$  (Table S2).<sup>6</sup>



$$V_{oc} = \frac{nkT}{q} \ln \left( \frac{J_{sc}}{J_{0,n}} + 1 \right) \approx \frac{nkT}{q} \ln \left( \frac{J_{sc}}{J_{so}} \right) + \frac{\Delta E_{DA}}{2q} \quad (4)$$

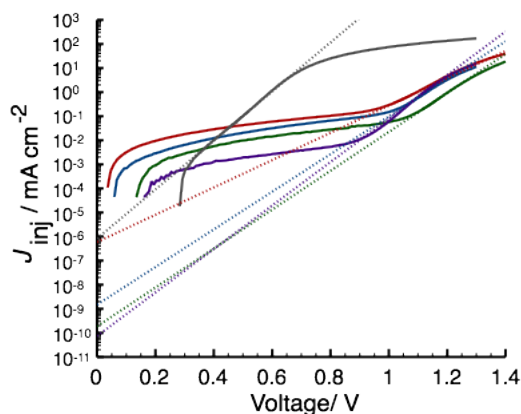

**Fig. S8.** Dark injected current  $J_{inj}$  versus voltage  $V$  for **1** (red), **2** (green), **3** (blue) and **4** (purple) and P3HT/PC<sub>61</sub>BM blended active layers. The dotted lines represent exponential fits, allowing determination of  $J_{0,n}$ .

**Table S2.** Summary of measured and simulated device parameters of BHJ solar cells based on mixed active layers composed of **1-4** and P3HT/PC<sub>61</sub>BM.

| active layer<br>(weight ratio)       | $J_{0,n}$<br>/mA cm <sup>-2</sup> | $\Delta E_{DA}^a$ | $J_{so}$<br>/mA cm <sup>-2</sup> | $V_{oc, cal}/V$ | $V_{oc, exp}/V$ |
|--------------------------------------|-----------------------------------|-------------------|----------------------------------|-----------------|-----------------|
| <b>1</b> / PC <sub>61</sub> BM (1:3) | $5.91 \times 10^{-7}$             | 1.43              | $6.70 \times 10^{-3}$            | 1.19            | 1.04            |
| <b>2</b> / PC <sub>61</sub> BM (1:4) | $1.85 \times 10^{-10}$            | 1.53              | $2.81 \times 10^{-4}$            | 1.26            | 1.15            |
| <b>3</b> / PC <sub>61</sub> BM (1:4) | $1.94 \times 10^{-9}$             | 1.36              | $3.06 \times 10^{-4}$            | 1.23            | 1.11            |
| <b>4</b> / PC <sub>61</sub> BM (1:3) | $7.40 \times 10^{-11}$            | 1.33              | $7.52 \times 10^{-5}$            | 1.21            | 1.13            |
| P3HT/ PC <sub>61</sub> BM (2:1)      | $8.28 \times 10^{-7}$             | 1.09              | $2.93 \times 10^{-1}$            | 0.69            | 0.65            |

<sup>a</sup> the energy difference between the HOMO of donor and the LUMO of acceptor materials.

## References

1. G. G. Malliaras, J. R. Salem, P. J. Brock, C. Scott, *Phys. Rev. B*, 1998, **58**, R13411.
2. C. Goh, R. J. Kline, M. D. McGehee, E. N. Kadnikova, J. M. J. Fréchet, *Appl. Phys. Lett.*, 2005, **86**, 12110.
3. Y. Liang, D. Feng, Y. Wu, S. -T. Tsai, G. Li, C. Ray, L. Yu, *J. Am. Chem. Soc.*, 2009, **131**, 7792.
4. Z. B. Wang, M. G. Helander, M. T. Greiner, J. Qiu, Z. H. Lu, *J. Appl. Phys.*, 2010, **107**, 034506.
5. K. Vandewal, K. Tvingstedt, A. Gadisa, O. Inganäs, J. Manca, *Nat. Mater.*, 2009, **8**, 904.
6. M. D. Perez, C. Borek, S. R. Forrest, M. E. Thompson, *J. Am. Chem. Soc.*, 2009, **131**, 9281.
